# Supplementary material for: Valence regulation in europium-doped fluoride phosphor for high-resolution X-ray time-lapse imaging
Source: Royal Society of Chemistry journal article supplement (doi:10.1039/d4tc01443j), 2024-01-01
Supplement: d4tc01443j1.pdf [file d4tc01443j1.pdf]

## Supporting Information

# Valence Regulation in Europium Doped Fluoride Phosphor for High Resolution X-ray Time-lapse Imaging

Jian Zhang<sup>1</sup>, Xin Li<sup>1</sup>, Wei Zeng<sup>2</sup>, Daiyuan Liu<sup>1</sup>, Lan Lu<sup>1</sup>, Heng Dai<sup>1</sup>, Junheng Yuan<sup>1</sup>,  
Jianxiong Shao<sup>3</sup>, Zhichao Liu<sup>1</sup>, Jie Yu<sup>1\*</sup>, Xuhui Xu<sup>1</sup>

<sup>1</sup> Yunnan Joint International Laboratory of Optoelectronic Materials and Devices,  
Faculty of Materials Science and Engineering, Kunming University of Science and  
Technology, Kunming Yunnan 650093, Yunnan, China.

<sup>2</sup> Key Laboratory of Eco-Environment-Related Polymer Materials of Ministry of  
Education, College of Chemistry and Chemical Engineering, Northwest Normal  
University, 967 Anning East Road, Lanzhou 730070, P. R. China.

<sup>3</sup> Department of Modern Physics, Lanzhou University, Lanzhou 730000, People's  
Republic of China.

Corresponding Author Email: [yujie@kust.edu.cn](mailto:yujie@kust.edu.cn) (Jie Yu).

**Table S1.** The refinement factors of SrF<sub>2</sub>: 0.5%Eu powder and SrF<sub>2</sub>: 0.5%Eu plate.

| Material                  | SrF <sub>2</sub> :0.5%Eu powder | SrF <sub>2</sub> :0.5%Eu plate |
|---------------------------|---------------------------------|--------------------------------|
| Synthesis temperature (K) | 1273                            | 1873                           |
| Measure temperature (K)   | 298                             | 298                            |
| Symmetry                  | Cubic                           | Cubic                          |
| Space group               | Fm-3m                           | Fm-3m                          |
| a/ Å                      | 5.84259                         | 5.76304                        |
| b/ Å                      | 5.84259                         | 5.76304                        |
| c/ Å                      | 5.84259                         | 5.76304                        |
| $\alpha$                  | 90                              | 90                             |
| $\beta$                   | 90                              | 90                             |
| $\gamma$                  | 90                              | 90                             |
| V/ Å <sup>3</sup>         | 199.4418                        | 191.405                        |
| Rwp (%)                   | 9.03                            | 8.33                           |
| Rp (%)                    | 6.98                            | 7.25                           |
| $\chi^2$                  | 3.78                            | 3.26                           |

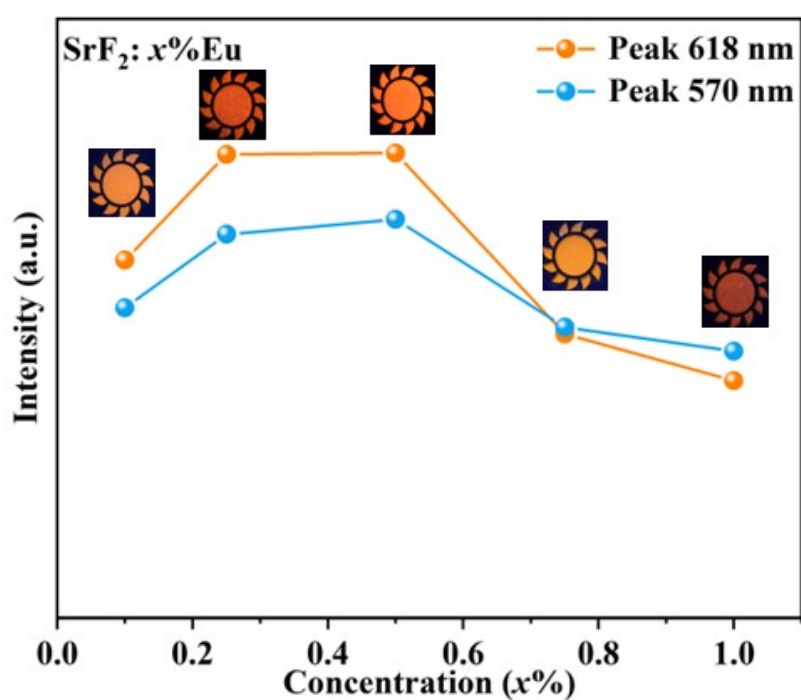

**Figure S1.** The PL intensity at 618 nm and 570 nm as the function of Eu concentration.

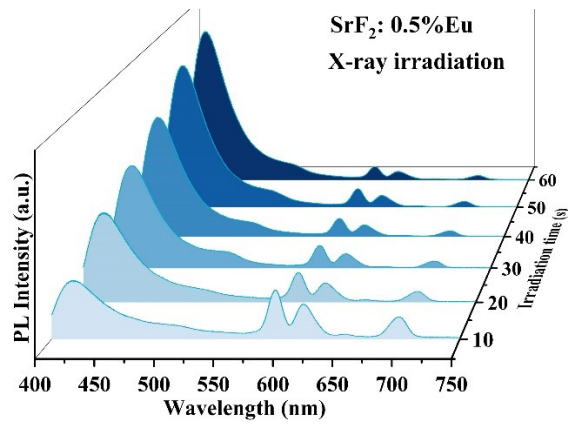

Figure S2. The PL spectra of SrF<sub>2</sub>: 0.5%Eu depending on the X-ray irradiation time.

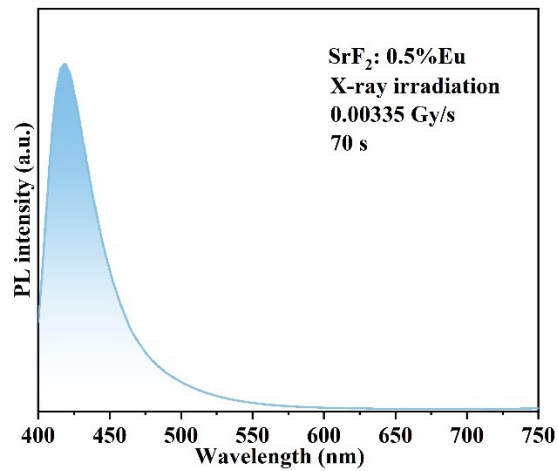

Figure S3. The PL spectra of SrF<sub>2</sub>: 0.5%Eu after X-ray irradiation 70 s.

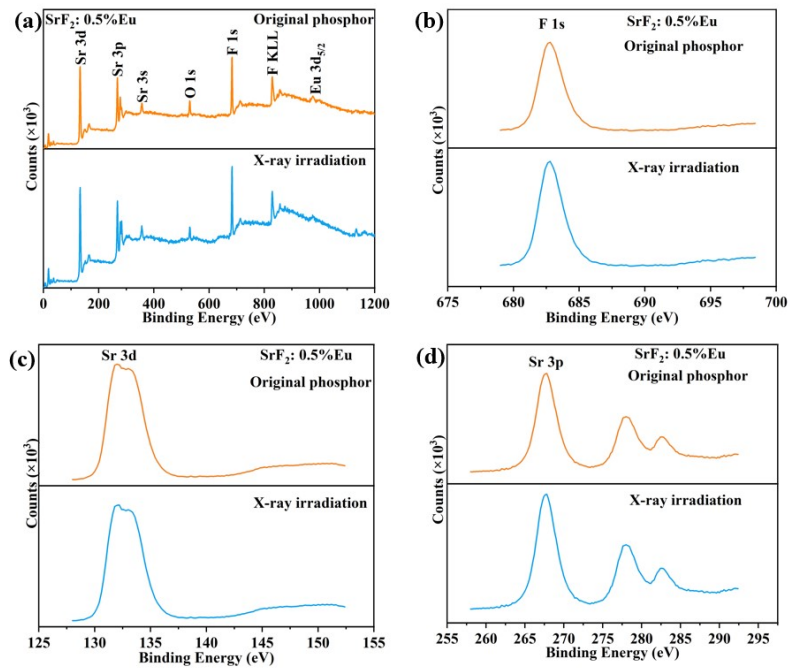

Figure S4. The XPS spectra of (a) SrF<sub>2</sub>: 0.5%Eu, (b) F 1s, (c) Sr 3d, (d) Sr 3p before and after X-ray irradiation.

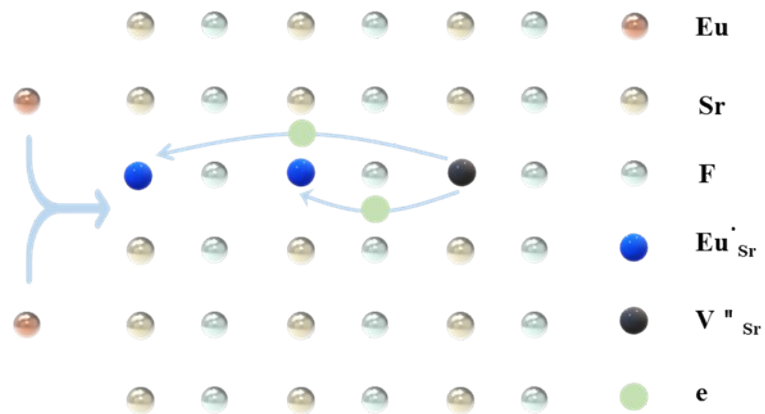

Figure S5. The mechanism of Eu<sup>3+</sup> self-reduction process.

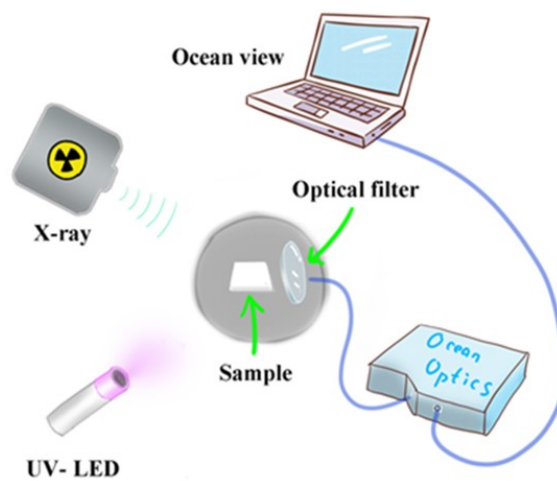

Figure S6. The schematic setup of the in-situ spectrum measurement.

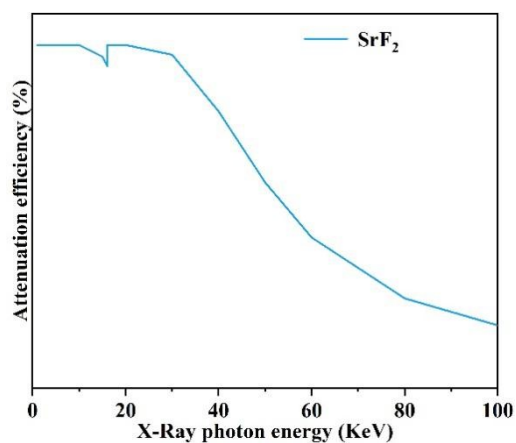

Figure S7. The X-ray attenuation efficiency of SrF<sub>2</sub>.

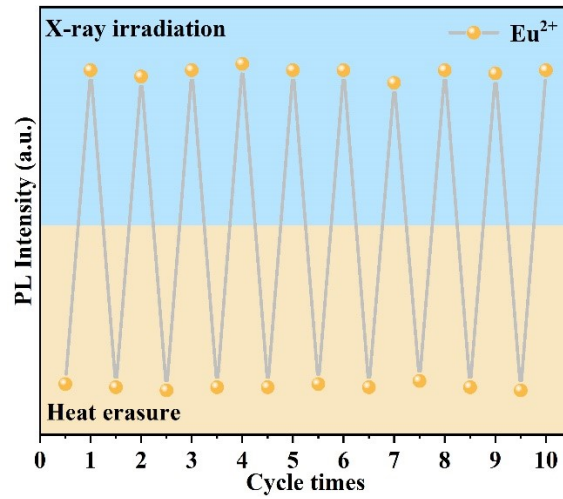

Figure S8. The reuse properties of  $\text{SrF}_2:0.5\%\text{Eu}$  with the treatment of X-ray irradiation and heat erasure.

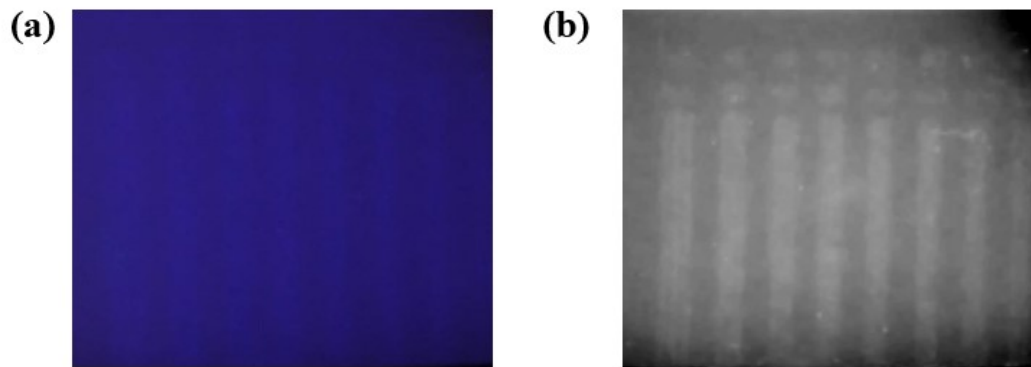

Figure S9. The digital picture and grayscale value picture of X-ray time-lapse imaging via classical imaging film technology.

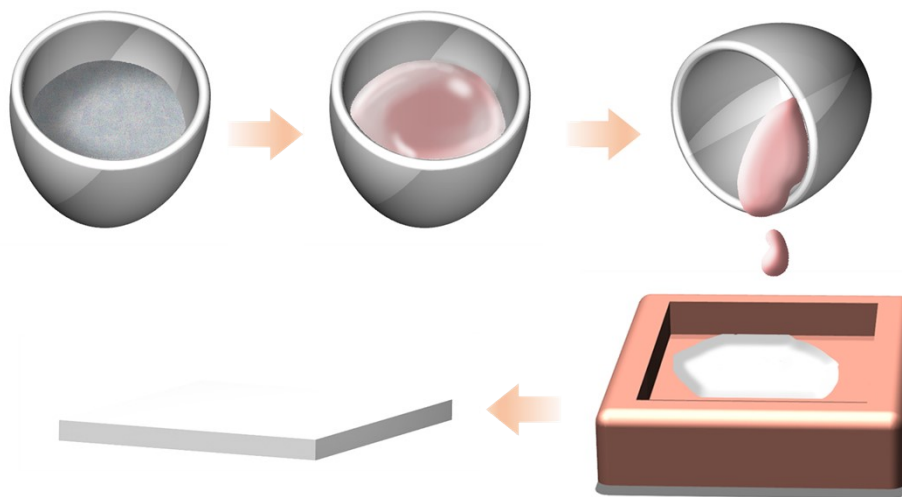

Figure S10. The fabricated process of  $\text{SrF}_2:0.5\%\text{Eu}$  bulk.

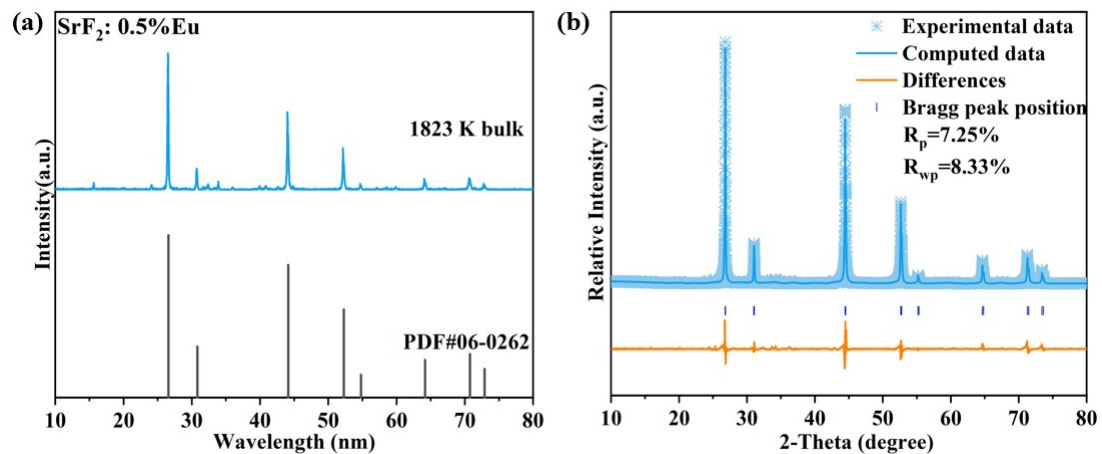

Figure S11. (a) The XRD patterns of SrF<sub>2</sub>: 0.5%Eu plate and phosphor. (b) The Rietveld refinement patterns of representative SrF<sub>2</sub>: 0.5%Eu plate.

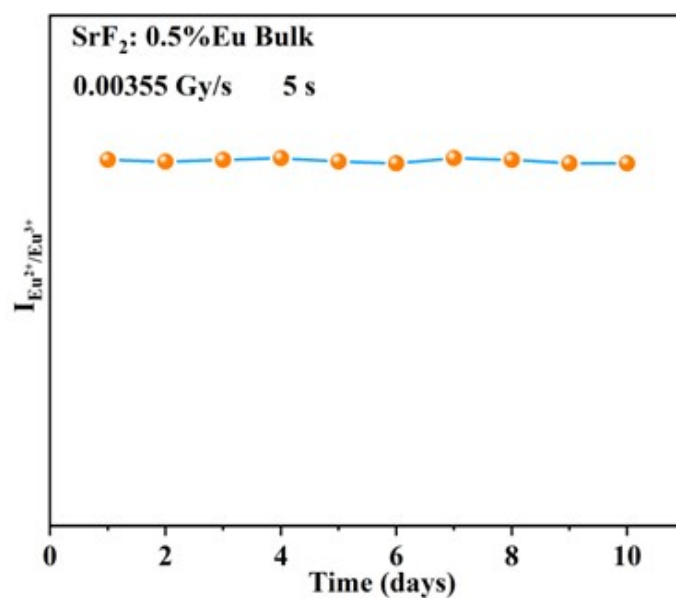

Figure S12. The X-ray irradiation stability of SrF<sub>2</sub>: 0.5%Eu plate.

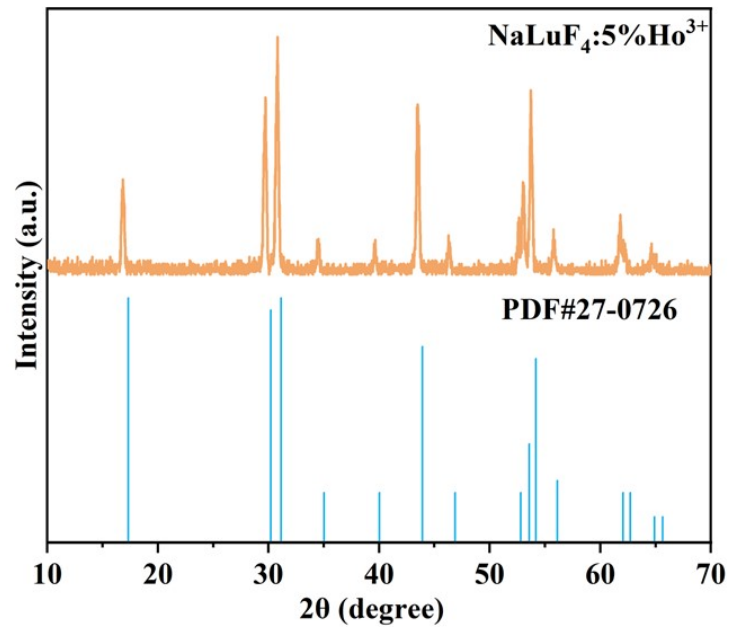

Figure S13. The XRD pattern of NaLuF<sub>4</sub>: 5%Ho<sup>3+</sup>.

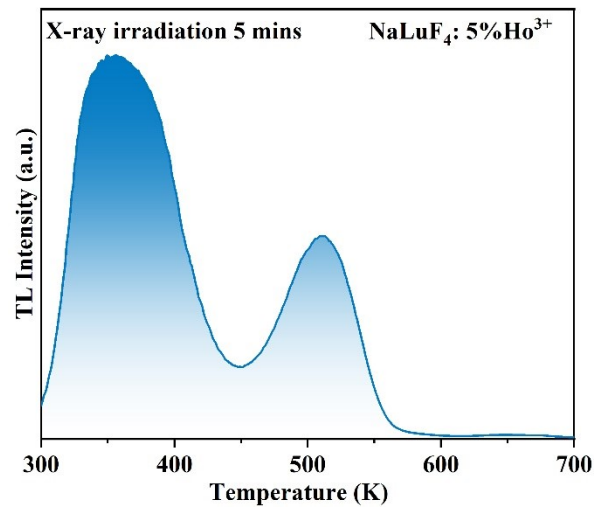

Figure S14. The TL curve of NaLuF<sub>4</sub>: 5%Ho<sup>3+</sup> charging with X-ray for 5 mins.
